# Supplementary material
Source: Elsevier journal article supplement (https://www.sciencedirect.com/science/article/pii/S0121812321000852)
Supplement: mmc1 [file S0121812321000852:mmc1.pdf]

## Artículo de Revisión

### **Preconcepción, embarazo y lactancia en pacientes con lupus eritematoso sistémico**

Preconception, pregnancy, and lactation in systemic lupus erythematosus patients

Victor R. Pimentel-Quiroz<sup>a,b</sup>, Ana M. Bertoli<sup>c</sup>, Manuel F. Ugarte-Gil<sup>a,b</sup>, Graciela S. Alarcón<sup>d,e\*</sup>

<sup>a</sup> Departamento de Reumatología, Hospital Nacional Guillermo Almenara Irigoyen – EsSalud, Lima, Perú

<sup>b</sup> Facultad de Medicina, Universidad Científica del Sur, Lima, Perú

<sup>c</sup> Servicio de Reumatología, Clínica Universitaria Reina Fabiola, Universidad Católica de Córdoba, Córdoba, Argentina

<sup>d</sup> División de Inmunología Clínica y Reumatología, Departamento de Medicina, Facultad de Medicina, The University of Alabama at Birmingham, Birmingham, AL, Estados Unidos

<sup>e</sup> Departamento de Medicina, Facultad de Medicina, Universidad Peruana Cayetano Heredia, Lima, Perú

\* *Corresponding author.*

#### Abstract

Systemic lupus erythematosus is a complex and chronic disease which impacts on the reproductive function of patients suffering this condition. This assertion is supported by the fact that lupus patients have a smaller family size in comparison to the general population as well as a higher risk of adverse pregnancy outcomes. While this disease *per se* does not affect fertility, there are several other factors affecting fertility such as age, drugs, disease activity, damage-related disease, and some comorbidities. Currently, there are several interventions to preserve fertility with very good outcomes, among them, cryopreservation or the use of gonadotropin releasing hormone agonists. It is recommended that lupus patients be in low disease activity or in remission for at least six months before conception and pregnancy. If the latter is achieved, multidisciplinary management is very important and recommended, but in particular, physicians must know how to differentiate between a lupus flare and pregnancy-related hypertension. The efficacy and safety of antimalarials throughout pregnancy has been demonstrated so its use must be continued and encouraged. Taking into account all the above,

fertility and pregnancy in lupus patients must be an integral part of the management of this disease.

## Resumen

El lupus eritematoso sistémico es una enfermedad compleja y crónica que afecta la función reproductiva de los pacientes que la presentan, considerando que suelen tener un tamaño familiar reducido en comparación con la población general, así como un riesgo más alto de resultados adversos perinatales. Si bien esta enfermedad *per se* no afecta la fertilidad, existen otros factores que la alteran, como la edad, los fármacos, la actividad de la enfermedad, el daño relacionado con ella y algunas comorbilidades. En la actualidad, existen numerosas intervenciones para preservar la fertilidad, con muy buenos resultados, entre las cuales se encuentran la criopreservación o el uso de análogos de la hormona liberadora de gonadotropinas. Es recomendable que los pacientes lúpicos se encuentren en baja actividad de la enfermedad o en remisión por al menos seis meses antes de la concepción y el embarazo. Si esto se logra, el manejo multidisciplinario es muy importante y recomendado pero, sobre todo, los médicos deben saber cómo diferenciar entre reactivación de la enfermedad y enfermedad hipertensiva del embarazo. Se ha demostrado la eficacia y la seguridad de los antimaláricos a lo largo del embarazo, por lo cual su uso debe ser continuado y aconsejado. Teniendo en cuenta lo señalado en las líneas precedentes, la fertilidad y el embarazo en pacientes lúpicos deben ser parte del manejo integral de esta enfermedad.

**Keywords:** Systemic lupus erythematosus; Preconception; Pregnancy; Fertility

**Palabras clave:** Lupus eritematoso sistémico; Preconcepción; Embarazo; Fertilidad

## Introducción

El lupus eritematoso sistémico (LES) es una enfermedad autoinmune compleja de etiología desconocida que afecta de manera desproporcionada a las mujeres en edad fértil<sup>1</sup>. Estas pacientes enfrentan una enfermedad crónica, que no solo afecta su salud física y mental, sino también su función reproductiva. Por ejemplo, algunos estudios han demostrado que las mujeres con enfermedades reumáticas, incluyendo a las pacientes con lupus, tienen un menor número de nacimientos y una familia más pequeña en comparación con la población general<sup>2-5</sup>. Por otra parte, aunque se han producido mejoras en el manejo de la enfermedad y el monitoreo perinatal durante las últimas cinco décadas, que han dado lugar a una disminución

significativa de las pérdidas de embarazos en estas pacientes<sup>6</sup>, en comparación con la población general, las pacientes con lupus aún tienen un mayor riesgo de presentar desenlaces adversos del embarazo. Por lo tanto, la fertilidad y el embarazo deben ser parte del manejo de esta enfermedad.

## Preconcepción

### Causas de infertilidad en las pacientes con lupus

Es importante señalar que no hay ninguna evidencia de que el LES *per se* cause infertilidad primaria<sup>4,7-12</sup>. La infertilidad secundaria, sin embargo, puede producirse por varias razones que incluyen la edad avanzada, medicamentos, comorbilidades, problemas psicosociales, actividad de la enfermedad y daños relacionados con la enfermedad.

Como se señaló, el LES se presenta con mayor frecuencia en las mujeres en edad fértil; a menudo los médicos exhortan a las pacientes a que eviten quedar embarazadas hasta que se logre un estado de remisión, o se discontinúen en forma segura los medicamentos potencialmente teratogénicos. Como consecuencia, muchas pacientes con lupus tienden a planificar un embarazo relativamente tarde en la vida, lo que se asocia con una disminución de la fertilidad, incluso en mujeres sanas<sup>11,13,14</sup>.

La insuficiencia ovárica primaria (IOP) es una causa importante de infertilidad en las pacientes con lupus; la IOP se define como una amenorrea persistente antes de los 40 años de edad y se asocia con niveles elevados de hormona foliculoestimulante circulante e hipoestrogenismo<sup>15</sup>. La ooforitis autoinmune puede ser la causa de la IOP<sup>16</sup>. Asimismo, el uso de la ciclofosfamida (CYC) puede causar una IOP con una incidencia que varía entre el 11% y el 59% en todos los grupos etarios, ya sea si se administra por vía oral o intravenosa<sup>17</sup>. Se sabe que la IOP inducida por CYC está relacionada con la edad y la dosis. Boumpas et al. encontraron que las pacientes con lupus >30 años de edad y las que utilizaron una mayor cantidad de dosis de CYC presentaron índices más altos de amenorrea sostenida<sup>18</sup>. De igual manera, Ioannidis et al. encontraron que el 50% y el 90% de las pacientes con lupus <32 años de edad presentaron amenorrea sostenida con dosis acumuladas de CYC de 8g/m<sup>2</sup> y 12g/m<sup>2</sup>, respectivamente<sup>19</sup>; en efecto, estos hallazgos están respaldados por el hecho de que las pacientes con LES que fueron tratadas con el protocolo Euro-lupus presentaron un menor riesgo de IOP que aquellas tratadas con el régimen de los Institutos Nacionales de Salud (en inglés: *National Institutes of Health*

[NIH])<sup>14</sup>. También es importante anotar que en la cohorte de Lupus en Minorías: Naturaleza *versus* Crianza LUMINA (por sus iniciales en inglés, *LUpus in MInorities: NAture versus nurture*), se encontró que la etnia hispana, principalmente los individuos de ascendencia mexicana que viven en los Estados Unidos constituye un predictor de IOP<sup>20</sup>.

Algunos medicamentos pueden causar infertilidad en las pacientes con lupus. Como ya se había señalado, la CYC es uno de los principales medicamentos que causan IOP; sin embargo, este fármaco también puede afectar a los pacientes masculinos con lupus debido al hecho de que altera la cantidad y la calidad del espermatozoides y el volumen testicular<sup>21</sup>. Otros medicamentos inmunosupresores, tales como el metotrexato, la azatioprina, el micofenolato, la ciclosporina A y el tacrolimus no tienen ningún efecto en la fertilidad en las pacientes con lupus<sup>13,14,16</sup>; es por eso, por ejemplo, que el micofenolato es una buena opción como terapia de inducción en las pacientes con lupus que desean quedar embarazadas, pero se debe considerar su riesgo teratogénico y por lo tanto, no continuarlo una vez que el embarazo ha comenzado. Otros fármacos que podrían estar asociados con infertilidad incluyen los medicamentos antiinflamatorios no esteroideos (AINEs) y los glucocorticoides (GC). Respecto a los AINEs, aunque su uso puede interferir con la ovulación debido a una disminución de la producción de prostaglandinas, hasta la fecha no disponemos de estudios clínicos rigurosos acerca de estos fármacos<sup>11,14</sup>. En cuanto a los GC, su asociación con la infertilidad es motivo de controversia debido a la dificultad para distinguir entre las irregularidades menstruales secundarias a altas dosis de GC y los efectos de la actividad de la enfermedad *per se*<sup>14</sup>.

La enfermedad activa y el daño relacionado con la enfermedad pueden influir en las tasas de fertilidad. La alta actividad de la enfermedad y los brotes de lupus se han asociado con infertilidad en diferentes estudios<sup>10,22,23</sup>. Esto podría deberse a la hiperprolactinemia con la consiguiente reducción de los niveles de hormona liberadora de gonadotropina (GnRH) y, como resultado, una ovulación deficiente<sup>24</sup>. Asimismo, los niveles de anticuerpos contra la hormona antimülleriana, que son indicativos de la reserva ovárica, se han encontrado más bajos en las pacientes con lupus que no han sido tratadas con CYC que en los controles sanos<sup>25</sup>. En cuanto al daño, la insuficiencia o la falla renal puede generar una alteración del eje hipotálamo-hipofisario que da lugar a un aumento de los niveles de prolactina; sin embargo, esto se puede revertir con un trasplante renal<sup>10,11,26</sup>.

Entre otras causas de infertilidad se encuentran los problemas psicosociales tales como ansiedad, depresión, fatiga, pérdida de la libido y disfunción sexual (en mujeres y en hombres),

que dan lugar a una disminución de la actividad sexual y, en consecuencia, a infertilidad<sup>5</sup>. Algunas comorbilidades podrían estar asociadas con infertilidad o aumentar el riesgo de presentarla; vale la pena mencionar el síndrome antifosfolípido (aFL)<sup>14</sup>, la tiroiditis de Hashimoto<sup>27</sup> y la inflamación cervico-vaginal<sup>28</sup>. En cuanto a los autoanticuerpos, parece que no afectan la fertilidad en las pacientes con lupus. En el pasado ha habido controversia sobre el posible papel de los anticuerpos anti-fosfolípidos (aFL); sin embargo, los resultados de estudios controlados no han demostrado que estos, *per se*, estén asociados con infertilidad o con desenlaces desfavorables en las pacientes sometidas a fertilización in vitro. (FIV)<sup>29</sup>.

### Métodos de preservación de la fertilidad

Debido a la frecuencia de infertilidad en las pacientes con lupus, se han desarrollado estrategias para contrarrestarla. Se deben recomendar estas estrategias a las pacientes que reciben medicamentos gonadotóxicos (como la CYC) y a las pacientes que deben posponer un embarazo debido a una enfermedad persistentemente activa.

Dado que la IOP inducida por CYC está relacionada con la edad y con la dosis, está indicado minimizar la dosis de CYC utilizando un esquema de inducción corto (protocolo Euro-lupus), utilizar otros medicamentos para la inducción tales como el micofenolato, o protocolos multidiana<sup>14</sup>. Sin embargo, en algunos casos, debido a la actividad severa de la enfermedad, es necesario utilizar altas dosis de CYC; en tales casos, se debe implementar la protección gonadal. En este sentido, los agonistas de la GnRH son medicamentos con un buen perfil de seguridad y eficacia para los pacientes con cáncer<sup>30,31</sup>; del mismo modo, en pacientes con LES, hay algunos estudios con datos prometedores<sup>32–34</sup>. Esta estrategia se aplica para la CYC oral e intravenosa; se recomienda administrar los agonistas de la GnRH 10–14 días (para la leuprolida) o 22 días (para la triptorelina) antes de la administración de la CYC y en la mitad del ciclo. No se recomienda el uso de testosterona para la preservación de la fertilidad masculina<sup>35,36</sup>.

La criopreservación es una buena opción para las pacientes con enfermedad estable debido al hecho de que la estimulación ovárica (EO) es necesaria (para el riesgo, véase más abajo); sin embargo, es difícil embarcarse en la criopreservación cuando la paciente necesita utilizar CYC para una enfermedad severa<sup>35</sup>. La criopreservación de ovocitos es la opción más popular y efectiva, y ya no es considerada una técnica experimental; es ideal para las mujeres que no tienen pareja y no requiere la fertilización de un óvulo después del procedimiento<sup>16,37</sup>. La

criopreservación de embriones es ideal para las mujeres que tienen pareja; sin embargo, esta técnica podría tener algunas implicaciones éticas<sup>16</sup>. Por otra parte, la congelación de tejido ovárico es una técnica experimental en la que se extrae tejido ovárico a través de una ooforectomía laparoscópica sin necesidad de EO; se puede realizar en la edad prepuberal y en algunos casos en los que el tratamiento se debe iniciar de inmediato<sup>11,16,38</sup>. Las limitaciones de todas las técnicas de criopreservación incluyen su alto costo, la falta de cobertura del seguro para el procedimiento, el número limitado de centros en los cuales está disponible, y las creencias de las pacientes.

### Técnicas de reproducción asistida

Como se señaló, las pacientes con lupus pueden no lograr buenos desenlaces del embarazo; es por esto que las técnicas de reproducción asistida (TRA) son una buena opción para estas pacientes. Estas técnicas incluyen la EO, FIV, transferencia de embriones y recuperación de ovocitos.

Aunque todavía existe cierta preocupación acerca del riesgo de brotes o trombosis debido a la estimulación hormonal que aumenta los niveles de  $17\beta$ -estradiol, algunos estudios han demostrado que el uso de TRA es seguro y exitoso. Por ejemplo, Orquevaux et al. en un estudio que evaluó a 37 pacientes con lupus y SAF a quienes les realizaron 97 procedimientos de FIV, encontró que 26 (70%) pacientes dieron a luz al menos un niño sano; solo se presentaron complicaciones en ocho ciclos de FIV (cuatro brotes de lupus y cuatro eventos tromboembólicos) y no hubo ningún caso de síndrome de hiperestimulación ovárica (SHO)<sup>39</sup>. Asimismo, Ragab et al. en un estudio de 65 pacientes con lupus que fueron sometidas a EO, 20 de ellas quedaron embarazadas y solo en cuatro casos se presentaron complicaciones por el SHO.<sup>40</sup> Otros estudios, algunos de ellos que incluyeron pacientes con otras enfermedades reumáticas, encontraron resultados similares<sup>38,41,42</sup>. Cabe señalar que las tasas de embarazo en las pacientes con lupus sometidas a TRA son similares a las observadas en la población general (hasta del 30%)<sup>43</sup>.

A pesar de estos buenos desenlaces, es importante considerar algunos puntos adicionales. Uno de ellos tiene que ver con un enfoque profiláctico, especialmente en las pacientes con anticuerpos aFL, en quienes se recomienda el uso de dosis bajas de aspirina y/o heparina. En contraste, no se recomienda el incremento empírico de la dosis de GC como medida profiláctica

en las pacientes que se someten a TRA. En relación con la actividad de la enfermedad, se recomienda encarecidamente que las mujeres que se van a someter a TRA estén en remisión o con una baja actividad de la enfermedad (por lo menos durante seis meses)<sup>12,35,38</sup>. En cuanto a las TRA, se recomienda utilizar protocolos más suaves de estimulación hormonal o de antagonistas de la GnRH para disminuir el riesgo de brotes, trombosis o SHO<sup>12,44</sup>. Es importante señalar que algunas pacientes podrían ser candidatas para las TRA; sin embargo, es posible que no se recomiende el embarazo en presencia de daño por lupus (es decir, insuficiencia renal severa, hipertensión pulmonar); en estos casos, la FIV seguida de una transferencia de embriones a una portadora gestacional (gestante sustituta) podría ser la alternativa preferida<sup>38</sup>.

Sobra decir que es importante un enfoque multidisciplinario en las pacientes con lupus que solicitan TRA si se quiere lograr un desenlace exitoso del embarazo.

## Embarazo

### Desenlaces

Estudios comparativos que utilizan registros nacionales han reportado un mayor riesgo de abortos espontáneos, trabajo de parto pretérmino, restricción del crecimiento intrauterino (RCIU) y muerte fetal en las pacientes con lupus<sup>45,46</sup>. En un estudio realizado en los Estados Unidos<sup>47</sup>, que utilizó la Muestra Nacional de Pacientes Hospitalizados (*Nationwide Inpatient Sample*) y comparó los embarazos de las pacientes con LES con los de un grupo control, se encontraron tasas significativamente más altas de trastornos hipertensivos [Razón de probabilidades (OR): 3,3 (IC 95% 2,8–4,0)], RCIU [OR: 3,5 (IC 95% 2,5–4,9)] y parto por cesárea [OR: 1,6 (CI 95% 1,4–1,9)] entre las pacientes con lupus; además, estas pacientes tuvieron una duración más prolongada de la estancia hospitalaria incluso después de hacer los ajustes para el parto por cesárea. Un estudio posterior enfocado en el embarazo con lupus en esta base de datos durante los años 2000–2003<sup>46</sup>, reveló que la mortalidad materna fue 20 veces mayor entre las mujeres con LES que en aquellas de la población general; asimismo, las pacientes con lupus tuvieron un mayor riesgo de presentar un trabajo de parto prematuro, preeclampsia, y parto por cesárea; también tuvieron más probabilidades de tener otras comorbilidades asociadas con desenlaces adversos del embarazo, tales como diabetes, hipertensión y trombofilia. Estos desenlaces desfavorables también han sido bien documentados en varias cohortes de lupus<sup>48–50</sup> así como en estudios de revisión de registros médicos relativamente pequeños de un solo centro<sup>51–54</sup> en pacientes de diferentes orígenes

étnicos en todo el mundo. Aunque la mayoría de estos estudios incluyeron a pacientes adultas con LES, estos hallazgos parecen replicarse entre las pacientes adolescentes<sup>55</sup>. Los índices de desenlaces adversos del embarazo, las exacerbaciones de la enfermedad durante el embarazo y la hipertensión inducida por el embarazo publicados durante los últimos cinco años se presentan en la Tabla 1. Parece que la ocurrencia de brotes de la enfermedad aumenta durante los embarazos con LES pero disminuye si se pospone el embarazo hasta que la enfermedad esté inactiva<sup>47</sup>.

Tabla 1 – Probabilidades de desenlaces fetales adversos, brotes de lupus durante el embarazo e hipertensión inducida por el embarazo.

| Autores                           | País            | Año de publicación | Origen étnico                          | Diseño del estudio                                                                  | Número de embarazos | Embarazo planificado (%) | Desenlace fetal adverso (%) <sup>a</sup> | Brotes de la enfermedad (%) | Hipertensión inducida por el embarazo (%) <sup>b</sup> |
|-----------------------------------|-----------------|--------------------|----------------------------------------|-------------------------------------------------------------------------------------|---------------------|--------------------------|------------------------------------------|-----------------------------|--------------------------------------------------------|
| Jakobsen et al. <sup>59</sup>     | Dinamarca       | 2015               | Caucásico                              | Cohorte incidente                                                                   | 84                  | ND                       | 38,1                                     | 46,4                        | 13,1                                                   |
| Kroese et al. <sup>100</sup>      | Países Bajos    | 2017               | Multiétnico (principalmente Caucásico) | Prospectivo de cohorte                                                              | 96                  | ND                       | 51,6                                     | 18,8                        | 32,7                                                   |
| Chen et al. <sup>101</sup>        | China           | 2015               | Chino                                  | Estudio retrospectivo                                                               | 83                  | 61,4                     | 31,3                                     | 42,2                        | 45,8                                                   |
| Chen et al. <sup>57</sup>         | China           | 2018               | Chino                                  | Estudio multicéntrico retrospectivo                                                 | 243                 | 100                      | 35,4                                     | 21,4                        | 11,9                                                   |
| Wu et al. <sup>102</sup>          | China           | 2018               | Chino                                  | Retrospectivo de cohorte                                                            | 338                 | 86,7                     | ND                                       | 24,0                        | 33,9                                                   |
| Tedeschi et al. <sup>58</sup>     | EE.UU.          | 2016               | Multiétnico (principalmente Caucásico) | Retrospectivo de cohorte                                                            | 114                 | 38,3                     | 23,5                                     | ND                          | ND                                                     |
| Ling et al. <sup>55</sup>         | EE.UU.          | 2018               | Multiétnico                            | Muestra Nacional de Pacientes Hospitalizados ( <i>Nationwide Inpatient Sample</i> ) | 4002                | ND                       | 25,5                                     | ND                          | 16,0                                                   |
| Davis-Porada et al. <sup>50</sup> | EE.UU. – Canadá | 2020               | Multiétnico                            | Prospectivo de cohorte                                                              | 384                 | Sí                       | 19,0                                     | 26,0                        | ND                                                     |

ND: No disponible

<sup>a</sup> Incluye parto pretérmino, retardo del crecimiento intrauterino, sufrimiento fetal, pérdida fetal.

<sup>b</sup> Incluye hipertensión gestacional, preeclampsia, eclampsia.



Importantemente, la actividad de la enfermedad en el LES, la presencia de proteinuria, nefritis lúpica activa previa y/o hipertensión arterial se han asociado con partos prematuros y recién nacidos pequeños para su edad gestacional<sup>48,56-58</sup>. Del mismo modo, una alta actividad de la enfermedad en el momento de la concepción (o en los meses que la preceden) es reconocida como un predictor independiente de un mayor riesgo de desenlaces adversos del embarazo, incluyendo la prematuridad, RCIU y pérdidas fetales<sup>56,57,59</sup>. Más aún, variables como la hipertensión arterial basal y la presencia de anticuerpos aFL, en particular el anticoagulante lúpico<sup>49,60,61</sup> así como la triple positividad, se han asociado con pérdidas fetales<sup>56,62,63</sup>. Otras variables, tales como el uso de altas dosis de GC, bajos recuentos de plaquetas, activación del complemento, serositis y menos años de educación también se han asociado con desenlaces adversos del embarazo<sup>48,49,58,64</sup>. Más recientemente, el efecto de niveles de colesterol e índices de masa corporal más altos también se ha asociado con desenlaces del embarazo más desfavorables<sup>65</sup>. Por el contrario, los desenlaces del embarazo son mejores y las tasas de exacerbación de la enfermedad no aumentan si las pacientes quedan embarazadas mientras se encuentran en remisión o con bajos niveles de actividad de la enfermedad<sup>49,50</sup>. El conocimiento acumulado ha dado lugar a la actual recomendación de que a las pacientes con lupus se les debe aconsejar que consideren el embarazo únicamente durante los períodos de enfermedad inactiva o estable<sup>46,48</sup>, el así llamado "embarazo planificado", y lograr por lo menos seis meses de enfermedad inactiva antes de intentar la concepción<sup>50</sup>. Desafortunadamente, muchos embarazos en las pacientes con lupus son no planificados o la concepción se produce en contra del consejo del médico.

Es importante anotar que la probabilidad de tener un recién nacido pequeño para la edad gestacional se redujo en un 85% en las mujeres que recibieron terapia con hidroxicloroquina (HCQ) durante todo el embarazo. Además, los beneficios de la HCQ incluyen el mantenimiento de un buen control de la enfermedad durante el embarazo<sup>66-68</sup>. Sin embargo, algunos médicos, incluyendo los reumatólogos y obstetras, pueden recomendar a sus pacientes que discontinúen su consumo<sup>69,70</sup>; desafortunadamente, una vez que se le dice a una mujer que no tome un medicamento porque puede afectar el desenlace de su embarazo, es posible que ella se muestre renuente a reiniciarlo a pesar de que se le presenten datos sólidos a favor de hacerlo. Por lo tanto, se debe exhortar a los médicos que tratan pacientes embarazadas con lupus a que recomienden el uso de HCQ antes, durante y después del embarazo.

## Diferencias entre un brote de lupus y la preeclampsia

Una revisión sistemática de la literatura que incluyó 37 estudios sobre desenlaces del embarazo en mujeres con LES y un metaanálisis acerca de la asociación de la nefritis lúpica con desenlaces adversos del embarazo, mostró que se presentaron brotes de lupus en el 25,6% de las pacientes, hipertensión en el 16,3%, nefritis en el 16,1% y pre-eclampsia en el 7,6%<sup>71</sup>. Incluso para las pacientes en quienes la nefritis se encuentra clínicamente inactiva, el compromiso renal anterior genera preocupaciones con respecto a la aparición de brotes renales y los desenlaces generales del embarazo.

Es difícil diferenciar entre un brote de lupus y la preeclampsia debido a algunas características superpuestas. Por ejemplo, en ambas entidades se puede encontrar trombocitopenia, edema, proteinuria e hipertensión. Sin embargo, la hipertensión aparece durante todo el embarazo en los brotes de lupus, mientras que en la preeclampsia no se presenta antes de las 20 semanas y en la mayoría de las pacientes aparece después de las 34 semanas de gestación. Los hallazgos de laboratorio (tales como leucopenia, niveles bajos de complemento, títulos de anti-dsDNA en aumento, sedimento urinario activo) son útiles no solo para el monitoreo de la actividad del LES sino también para la diferenciación entre los brotes de lupus y la preeclampsia (niveles elevados de ácido úrico, enzimas hepáticas elevadas)<sup>72</sup>. Como se comentó, aunque una serología activa es útil para la diferenciación entre un brote de lupus y la preeclampsia, algunas veces puede ser difícil distinguir las dos entidades, particularmente en las pacientes que presentan características graves tales como el síndrome HELLP (hemólisis, enzimas hepáticas elevadas y plaquetas bajas); este por lo general es el caso en las pacientes que presentan hepatitis o nefritis lúpica. Los brotes de LES renal a menudo se asocian con aumentos de la proteinuria y/o un sedimento urinario activo (hematuria, cilindros celulares) y elevaciones significativas del nivel de creatinina sérica, mientras que la hipertensión, aunque está presente, puede ser menos pronunciada en comparación con la preeclampsia con características severas/síndrome HELLP. Es más probable que el inicio agudo de una hipertensión acelerada se deba a preeclampsia y no a un brote de lupus. Por otra parte, puede ser más difícil atribuir la trombocitopenia y la anemia hemolítica ya sea a un brote de lupus o al síndrome HELLP. El tratamiento de estas afecciones es totalmente diferente: en la actualidad se recomiendan los medicamentos inmunosupresores para los brotes de lupus y la terminación del embarazo para los casos de preeclampsia.

## Tratamiento de los brotes de lupus durante el embarazo

De acuerdo con las recomendaciones publicadas en el año 2017 por la Liga Europea Contra el Reumatismo (EULAR)<sup>12</sup>, se pueden utilizar los siguientes medicamentos para la prevención y el manejo de los brotes de LES durante el embarazo:

- ☐ HCQ, GC orales, azatioprina, ciclosporina A y tacrolimus.
- ☐ Los brotes de moderados a severos se pueden manejar con estrategias adicionales, incluyendo la terapia con pulsos intravenosos de GC, inmunoglobulina intravenosa y plasmaféresis.
- ☐ Se deben evitar otros medicamentos tales como micofenolato, CYC, leflunomida y metotrexato.

Estos datos están respaldados por algunos estudios de alta calidad, la mayoría de los cuales, sin embargo, son no controlados. Solo hay un estudio aleatorizado, controlado con placebo que respalda el papel beneficioso de la HCQ<sup>66</sup> en el control de la actividad de la enfermedad y la prevención de brotes durante el embarazo; por lo tanto, y como se ha señalado, se recomienda su uso durante todo el embarazo. La HCQ también puede reducir la probabilidad de que se produzca un bloqueo cardíaco en los fetos expuestos a anticuerpos anti-Ro/SSA maternos<sup>73,74</sup> así como las probabilidades de prematuridad y RCIU<sup>67</sup>. Sin embargo, un metaanálisis reciente no pudo comprobar la eficacia de la HCQ en la prevención de la prematuridad así como de la RCIU en los embarazos con LES<sup>75</sup>. Algunos estudios no controlados sugieren que existe una aceptable relación riesgo/beneficio en los GC orales<sup>76,77</sup>, la azatioprina<sup>78,79</sup> y los inhibidores de la calcineurina<sup>80</sup>.

## Beneficios de los antimaláricos para los desenlaces del embarazo

Los medicamentos antimaláricos (AM), tales como la HCQ y la cloroquina, se deben continuar durante el embarazo, debido a que reducen el riesgo de complicaciones fetales y maternas. En cuanto a las complicaciones fetales, aquellos embarazos sin exposición a la HCQ tuvieron un mayor riesgo de parto pretérmino

[riesgo relativo (RR): 6,0 (IC 95% 1,6–22,0)] en un análisis retrospectivo de todas las pacientes con LES admitidas para dar a luz a las 22 semanas de gestación en un hospital de Burdeos<sup>67</sup>. Otro estudio de los Países Bajos encontró que entre los bebés prematuros nacidos vivos, la

duración del embarazo fue mayor en las usuarias de HCQ<sup>81</sup>. Sin embargo, un metaanálisis que incluyó seis estudios no logró comprobar la eficacia de la HCQ en la prevención de la prematuridad; no obstante, como los estudios incluidos en este metaanálisis fueron heterogéneos, los resultados de dicho metaanálisis deben ser interpretados con cautela<sup>82</sup>. Adicionalmente, en una cohorte retrospectiva coreana, el uso de la HCQ se asoció con un menor riesgo de preeclampsia [OR: 0,11 (IC 95% 0,02–0,67)]<sup>83</sup>. De manera similar, en un estudio de México, el uso de AM se asoció con un menor riesgo de preeclampsia [RR 0,21 (IC 95% 0,08–0,53)]<sup>84</sup>.

Se ha reportado un porcentaje más bajo de pacientes con enfermedad activa durante el embarazo (definido como un puntaje SLEDAI $\geq$ 4) en las pacientes que siguen tomando HCQ durante su embarazo (52%) que en aquellas que nunca la utilizaron (62%) y en aquellas que la suspendieron (84%),  $p=0,0075$ ; estos datos provienen de un análisis longitudinal que se llevó a cabo en la cohorte *Hopkins Lupus Pregnancy*<sup>68</sup>. De manera similar, en otra cohorte retrospectiva coreana, la discontinuación de la HCQ se asoció con una mayor frecuencia de brotes<sup>85</sup>. Aún más, el uso de la HCQ podría mitigar el riesgo de brotes durante y después del embarazo<sup>86</sup>, y se asoció con una mejoría de la actividad de la enfermedad durante el embarazo, comparado con el placebo, en un pequeño ensayo clínico<sup>66</sup>.

## Lactancia y planificación familiar

### Medicamentos y lactancia

Solo hay reportes escasos y breves acerca de la seguridad de los medicamentos en la lactancia, y han sido resumidos en las Directrices de la Sociedad Británica de Reumatología y de los Profesionales Británicos de la Salud en Reumatología<sup>87,88</sup>; también han sido incluidos en las recomendaciones de la EULAR<sup>89</sup>.

Los inhibidores no selectivos de la COX (AINES clásicos) pueden ser detectados en una concentración mínima, se pueden utilizar durante la lactancia, pero se deben preferir los agentes de vida corta<sup>87,89</sup>. Entre los inhibidores selectivos de la COX-II, solo se ha estudiado el celecoxib<sup>90,91</sup>; su concentración en la leche es mínima, por lo que se puede utilizar. No se recomiendan otros inhibidores de la COX debido a la falta de información acerca de estos fármacos<sup>87,89</sup>.

En cuanto a los GC, se pueden detectar en la leche materna, sin embargo, en una concentración mínima. Se pueden utilizar en forma segura si la dosis es inferior a 50mg/d, pero si la dosis es mayor o igual a 50mg/d, se debe considerar una espera de 4 horas antes de amamantar al bebé<sup>89,92,93</sup>. Los AM se pueden detectar en la leche materna en una concentración mínima; sin embargo, se pueden utilizar en forma segura y no se ha reportado ningún evento adverso<sup>89,92-94</sup>. No hay datos publicados acerca de la seguridad de la mecaprina, y por lo tanto no se recomienda.

Entre los medicamentos inmunosupresores convencionales, la azatioprina (dosis <2m/kg/d), la ciclosporina A y el tacrolimus son compatibles con la lactancia; pero el metotrexato, la leflunomida, la CYC y el micofenolato están contraindicados<sup>88</sup>. No se recomiendan los agentes biológicos como el rituximab o el belimumab<sup>88</sup>; sin embargo, su absorción es poco probable debido a su baja biodisponibilidad<sup>89</sup>. Con base en las propiedades farmacológicas de los biológicos, no se debe desincentivar la lactancia cuando se usan estos agentes, si no hay otras opciones disponibles<sup>89</sup>. La administración de inmunoglobulina intravenosa es segura y es compatible con la lactancia materna<sup>88</sup>.

## Recomendaciones sobre planificación familiar

### Embarazo planificado

Sobre la base de los datos presentados, la clave para un embarazo exitoso en las pacientes con lupus es un enfoque interdisciplinario con un estrecho monitoreo médico, obstétrico y neonatal. Esto implica: (a) una evaluación previa a la concepción para establecer los riesgos del embarazo e informar a las mujeres acerca de dichos riesgos; (b) planificar el embarazo cuando la nefritis lúpica está inactiva, manteniéndola inactiva con la dosis más baja posible de medicamentos permitidos; (c) tratamiento adecuado de los factores de riesgo conocidos (hipertensión arterial, sobrepeso, niveles de colesterol, tabaquismo, anticuerpos aFL); (d) vigilancia estrecha durante y después del embarazo para identificar y tratar rápidamente los brotes de LES y las complicaciones obstétricas<sup>56</sup>.

### Métodos anticonceptivos

Las mujeres con LES deben ser asesoradas acerca de la anticoncepción, en particular aquellas con enfermedad activa o quienes están utilizando medicamentos teratogénicos. La Organización Mundial de la Salud incluye al LES como una de las afecciones con

recomendaciones específicas<sup>95</sup> y la EULAR también ha publicado sus recomendaciones para estas pacientes<sup>12</sup>.

Las medidas anticonceptivas deben ser discutidas basándose en los factores de riesgo, incluyendo los factores de riesgo generales (como hipertensión, obesidad, consumo de tabaco, antecedentes familiares de cánceres hormonodependientes) y factores relacionados con la enfermedad, especialmente la actividad de la enfermedad, el daño y el riesgo de trombosis<sup>12,95</sup>.

A todas las pacientes se les puede ofrecer un dispositivo intrauterino (DIU), a menos que exista una contraindicación ginecológica. El DIU de cobre se podría utilizar en todas las pacientes, mientras que el DIU que contiene levonorgestrel solo podría recomendarse si los beneficios de la hormona superan el riesgo de trombosis<sup>12,95</sup>. En una pequeña cohorte retrospectiva, la actividad de la enfermedad no aumentó en las pacientes que comenzaron a utilizar un DIU que contiene levonorgestrel, pero dos pacientes presentaron trombosis arterial (ambas pacientes fueron positivas para anticuerpos aFL)<sup>96</sup>. Con excepción de la trombocitopenia severa, el DIU de cobre es el método anticonceptivo mejor calificado para las pacientes con LES debido a su seguridad<sup>95</sup>; no obstante, se pueden producir infecciones con mayor frecuencia en comparación con aquellas pacientes que utilizan anticonceptivos orales<sup>97</sup>; sin embargo, esto no ha sido reportado en forma consistente<sup>98</sup>.

La seguridad de los anticonceptivos orales combinados<sup>97-99</sup> y las formulaciones de solo progestina<sup>97</sup> ha sido evaluada en ensayos clínicos aleatorizados, pero estos estudios excluyeron a las pacientes con una actividad severa de la enfermedad, antecedentes de trombosis, presencia de anticuerpos aFL, entre otras contraindicaciones<sup>98</sup>. Con base en estos datos, estos anticonceptivos deben ser utilizados únicamente en pacientes con enfermedad inactiva o activa estable, sin antecedentes de trombosis y en quienes no tienen anticuerpos aFL. En las pacientes con anticuerpos aFL o antecedentes de trombosis, se debe desaconsejar firmemente el uso de hormonas (anticonceptivos orales, anillo vaginal y parche transdérmico)<sup>12,95,97,99</sup>.

El anillo vaginal y el parche transdérmico tienen un nivel de evidencia más bajo, y se recomiendan en las mismas situaciones que los anticonceptivos orales<sup>95</sup>.

## Conclusiones

La fertilidad en las pacientes con lupus constituye un gran desafío. Sin embargo, en la actualidad existen varias opciones para preservarla, de acuerdo a las características de la paciente (edad o grado de actividad de la enfermedad) que además pueden mejorar la probabilidad de un embarazo exitoso. Es importante aconsejarles a las pacientes con lupus que queden embarazadas cuando su enfermedad se encuentre en baja actividad o en remisión al menos durante seis meses. Aunque algunos medicamentos están contraindicados durante el embarazo, es importante tener en cuenta la eficacia y la seguridad de la HCQ en particular, y de los AM en general, durante todo el embarazo, por lo que se debe fomentar su uso. Se recomienda firmemente el manejo en equipo del paciente con lupus, antes, durante y después del embarazo.

## Conflicto de intereses

Los autores declaran que no tienen ningún conflicto de intereses.

## REFERENCIAS

1. Mok CC, Lau CS. Pathogenesis of systemic lupus erythematosus. *J Clin Pathol*. 2003;56:481–90. <http://dx.doi.org/10.1136/jcp.56.7.481>.
2. Skomsvoll JF, Ostensen M, Baste V, Irgens LM. Number of births, interpregnancy interval, and subsequent pregnancy rate after a diagnosis of inflammatory rheumatic disease in Norwegian women. *J Rheumatol*. 2001;28:2310–4.
3. Hardy CJ, Palmer BP, Morton SJ, Muir KR, Powell RJ. Pregnancy outcome and family size in systemic lupus erythematosus: a case–control study. *Rheumatology (Oxford)*. 1999;38:559–63. <http://dx.doi.org/10.1093/rheumatology/38.6.559>.
4. Clowse MEB, Chakravarty E, Costenbader KH, Chambers C, Michaud K. Effects of infertility, pregnancy loss, and patient concerns on family size of women with rheumatoid arthritis and systemic lupus erythematosus. *Arthritis Care Res* 7(Hoboken). 2012;64:668–74. <http://dx.doi.org/10.1002/acr.21593>.
5. Vinet E, Pineau C, Gordon C, Clarke AE, Bernatsky S. Systemic lupus erythematosus in women: impact on family size. *Arthritis Care Res* (Hoboken). 2008;59:1656–60. <http://dx.doi.org/10.1002/art.24203>.

6. Clark CA, Spitzer KA, Laskin CA. Decrease in pregnancy loss rates in patients with systemic lupus erythematosus over a 40-year period. *J Rheumatol*. 2005;32:1709–12.
7. Morel N, Bachelot A, Chakhtoura Z, Ghillani-Dalbin P, Amoura Z, Galicier L, et al. Study of anti-Müllerian hormone and its relation to the subsequent probability of pregnancy in 112 patients with systemic lupus erythematosus, exposed or not to cyclophosphamide. *J Clin Endocrinol Metab*. 2013;98:3785–92. <http://dx.doi.org/10.1210/jc.2013-1235>.
8. Ekblom-Kullberg S, Kautiainen H, Alha P, Helve T, Leirisalo-Repo M, Julkunen H. Reproductive health in women with systemic lupus erythematosus compared to population controls. *Scand J Rheumatol*. 2009;38:375–80.  
<http://dx.doi.org/10.1080/03009740902763099>.
9. Levine AB, Lockshin MD. Assisted reproductive technology in SLE and APS. *Lupus*. 2014;23:1239–41. <http://dx.doi.org/10.1177/0961203314527370>.
10. Bellver J, Pellicer A. Ovarian stimulation for ovulation induction and in vitro fertilization in patients with systemic lupus erythematosus and antiphospholipid syndrome. *Fertil Steril*. 2009;92:1803–10. <http://dx.doi.org/10.1016/j.fertnstert.2009.06.033>.
11. Bermas BL, Sammaritano LR. Fertility and pregnancy in rheumatoid arthritis and systemic lupus erythematosus. *Fertil Res Pract*. 2015;1. <http://dx.doi.org/10.1186/s40738-015-0004-3>.
12. Andreoli L, Bertias GK, Agmon-Levin N, Brown S, Cervera R, Costedoat-Chalumeau N, et al. EULAR recommendations for women's health and the management of family planning, assisted reproduction, pregnancy and menopause in patients with systemic lupus erythematosus and/or antiphospholipid syndrome. *Ann Rheum Dis*. 2017;76:476–85.  
<http://dx.doi.org/10.1136/annrheumdis-2016-209770>.
13. Lazzaroni MG, Dall'Ara F, Fredi M, Nalli C, Reggia R, Lojcono A, et al. A comprehensive review of the clinical approach to pregnancy and systemic lupus erythematosus. *J Autoimmun*. 2016;74:106–17. <http://dx.doi.org/10.1016/j.jaut.2016.06.016>.
14. Hickman RA, Gordon C. Causes and management of infertility in systemic lupus erythematosus. *Rheumatology (Oxford)*. 2011;50:1551–8.  
<http://dx.doi.org/10.1093/rheumatology/ker105>.
15. Shelling AN. Premature ovarian failure. *Reproduction*. 2010;140:633.  
<http://dx.doi.org/10.1530/REP-09-0567>.
16. Oktem O, Guzel Y, Aksoy S, Aydin E, Urman B. Ovarian function and reproductive outcomes of female patients with systemic lupus erythematosus and the strategies to preserve their fertility. *Obstet Gynecol Surv*. 2015;70:196–210.  
<http://dx.doi.org/10.1097/OGX.0000000000000160>.



17. Mok CC, Chan PT, To CH. Anti-Müllerian hormone and ovarian reserve in systemic lupus erythematosus. *Arthritis Rheum.* 2013;65:206–10. <http://dx.doi.org/10.1002/art.37719>.
18. Boumpas DT, Austin HA, Vaughan EM, Yarboro CH, Klippel JH, Balow JE. Risk for sustained amenorrhea in patients with systemic lupus erythematosus receiving intermittent pulse cyclophosphamide therapy. *Ann Intern Med.* 1993;119:366–9. <http://dx.doi.org/10.7326/0003-4819-119-5-199309010-00003>.
19. Ioannidis JPA, Katsifis GE, Tzioufas AG, Moutsopoulos HM. Predictors of sustained amenorrhea from pulse intravenous cyclophosphamide in premenopausal women with systemic lupus erythematosus. *J Rheumatol.* 2002;29:2129–35.
20. González LA, McGwin G, Durán S, Pons-Estel GJ, Apte M, Vilá LM, et al. Predictors of premature gonadal failure in patients with systemic lupus erythematosus. Results from LUMINA, a multiethnic US cohort (LUMINA LVIII). *Ann Rheum Dis.* 2008;67:1170–3. <http://dx.doi.org/10.1136/ard.2007.083436>.
21. Soares PMF, Borba EF, Bonfa E, Hallak J, Corrêa AL, Silva CAA. Gonad evaluation in male systemic lupus erythematosus. *Arthritis Rheum.* 2007;56:2352–61. <http://dx.doi.org/10.1002/art.22660>.
22. Pasoto SG, Mendonça BB, Bonfá E. Menstrual disturbances in patients with systemic lupus erythematosus without alkylating therapy: clinical, hormonal and therapeutic associations. *Lupus.* 2002;11:175–80. <http://dx.doi.org/10.1191/0961203302lu1630a>.
23. Silva CAA, Hilário MO, Febrônio MV, Oliveira SK, Terreri MT, Sacchetti SB, et al. Risk factors for amenorrhea in juvenile systemic lupus erythematosus (JSLE): a Brazilian multicentre cohort study. *Lupus.* 2007;16:531–6. <http://dx.doi.org/10.1177/0961203307079300>.
24. Blanco-Favela F, Quintal-Alvarez G, Leanos-Miranda A. Association between prolactin and disease activity in systemic lupus erythematosus. Influence of statistical power. *J Rheumatol.* 1999;26:55–9.
25. Lawrenz B, Henes J, Henes M, Neunhoffer E, Schmalzing M, Fehm T, et al. Impact of systemic lupus erythematosus on ovarian reserve in premenopausal women: evaluation by using anti-Müllerian hormone. *Lupus.* 2011;20:1193–7. <http://dx.doi.org/10.1177/0961203311409272>.
26. Gómez F, De La Cueva R, Wauters JP, Lemarchand-Béraud T. Endocrine abnormalities in patients undergoing long-term hemodialysis: the role of prolactin. *Am J Med.* 1980;68:522–30. [http://dx.doi.org/10.1016/0002-9343\(80\)90296-x](http://dx.doi.org/10.1016/0002-9343(80)90296-x).
27. Biró E, Szekanecz Z, Dankó K, Kiss E, Szabó NA, Szucs G, et al. Association of systemic and thyroid autoimmune diseases. *Clin Rheumatol.* 2006;25:240. <http://dx.doi.org/10.1007/s10067-005-1165-y>.

28. Febronio M, Pereira R, Bonfa E, Takiuti A, Pereyra E, Silva C. Inflammatory cervicovaginal cytology is associated with disease activity in juvenile systemic lupus erythematosus. *Lupus*. 2007;16:430–5. <http://dx.doi.org/10.1177/0961203307079298>.
29. Practice Committee of American Society for Reproductive Medicine. Anti-phospholipid antibodies do not affect IVF success. *Fertil Steril*. 2008;90(Suppl.):S172–3. doi:10.1016/j.fertnstert.2008.08.100.
30. Blumenfeld Z, Zur H, Dann EJ. Gonadotropin-releasing hormone agonist cotreatment during chemotherapy may increase pregnancy rate in survivors. *Oncologist*. 2015;20:1283–9. <http://dx.doi.org/10.1634/theoncologist.2015-0223>.
31. Moore HC, Unger JM, Phillips KA, Boyle F, Hitre E, Porter D, et al. Goserelin for ovarian protection during breast-cancer adjuvant chemotherapy. *N Engl J Med*. 2015;372:923–32. <http://dx.doi.org/10.1056/NEJMoa1413204>.
32. Somers EC, Marder W, Christman GM, Ogdenovski V, McCune WJ. Use of a gonadotropin-releasing hormone analog for protection against premature ovarian failure during cyclophosphamide therapy in women with severe lupus. *Arthritis Rheum*. 2005;52:2761–7. <http://dx.doi.org/10.1002/art.21263>.
33. Blumenfeld Z, Mischari O, Schultz N, Boulman N, Balbir-Gurman A. Gonadotropin releasing hormone agonists may minimize cyclophosphamide associated gonadotoxicity in SLE and autoimmune diseases. *Semin Arthritis Rheum*. 2011;41:346–52. <http://dx.doi.org/10.1016/j.semarthrit.2011.05.008>.
34. Koga T, Umeda M, Endo Y, Ishida M, Fujita Y, Tsuji S, et al. Effect of a gonadotropin-releasing hormone analog for ovarian function preservation after intravenous cyclophosphamide therapy in systemic lupus erythematosus patients: a retrospective inception cohort study. *Int J Rheum Dis*. 2018;21:1287–92. <http://dx.doi.org/10.1111/1756-185X.13318>.
35. Sammaritano LR, Bermas BL, Chakravarty EE, Chambers C, Clowse MEB, Lockshin MD, et al. 2020 American College of Rheumatology guideline for the management of reproductive health in rheumatic and musculoskeletal diseases. *Arthritis Rheumatol*. 2020;72:529–56. <http://dx.doi.org/10.1002/art.41191>.
36. Brunner HI, Silva CA, Reiff A, Higgins GC, Imundo L, Williams CB, et al. Randomized, double-blind, dose-escalation trial of triptorelin for ovary protection in childhood-onset systemic lupus erythematosus. *Arthritis Rheumatol*. 2015;67:1377–85. <http://dx.doi.org/10.1002/art.39024>.

37. Practice Committees of the American Society for Reproductive Medicine and the Society for Assisted Reproductive Technology. Mature oocyte cryopreservation: a guideline. *Fertil Steril*. 2013;99:37–43. <http://dx.doi.org/10.1016/j.fertnstert.2012.09.028>.
38. Vanni VS, De Lorenzo R, Privitera L, Canti V, Vigano P, Rovere-Querini P. Safety of fertility treatments in women with systemic autoimmune diseases (SADs). *Expert Opin Drug Saf*. 2019;18:841–52. <http://dx.doi.org/10.1080/14740338.2019.1636964>.
39. Orquevaux P, Masseau A, Le Guern V, Gayet V, Vauthier D, Guettrot-Imbert G, et al. In vitro fertilization in 37 women with systemic lupus erythematosus or antiphospholipid syndrome: a series of 97 procedures. *J Rheumatol*. 2017;44:613–8, <http://dx.doi.org/10.3899/jrheum.160462>.
40. Ragab A, Barakat R, Ragheb M, State O, Badawy A. Subfertility treatment in women with systemic lupus erythematosus. *J Obstet Gynaecol*. 2012;32:569–71. <http://dx.doi.org/10.3109/01443615.2012.693986>.
41. Reggia R, Andreoli L, Sebbar H, Canti V, Ceccarelli F, Favaro M, et al. An observational multicentre study on the efficacy and safety of assisted reproductive technologies in women with rheumatic diseases. *Rheumatol Adv Pract*. 2019;rkz005. <http://dx.doi.org/10.1093/rap/rkz005>.
42. Guballa N, Sammaritano L, Schwartzman S, Buyon J, Lockshin MD. Ovulation induction and in vitro fertilization in systemic lupus erythematosus and antiphospholipid syndrome. *Arthritis Rheum*. 2000;43:550–6. [http://dx.doi.org/10.1002/1529-0131\(200003\)43:3<550::AID-ANR10>3.0.CO;2-Y](http://dx.doi.org/10.1002/1529-0131(200003)43:3<550::AID-ANR10>3.0.CO;2-Y).
43. Huong DL, Wechsler B, Vauthier-Brouzes D, Duhaut P, Costedoat N, Lefebvre G, et al. Importance of planning ovulation induction therapy in systemic lupus erythematosus and antiphospholipid syndrome: a single center retrospective study of 21 cases and 114 cycles. *Semin Arthritis Rheum*. 2002;32:174–88. <http://dx.doi.org/10.1053/sarh.2002.37212>.
44. Al-Inany HG, Youssef MA, Ayeleke RO, Brown J, Lam WS, Broekmans FJ. Gonadotrophin-releasing hormone antagonists for assisted reproductive technology. *Cochrane Database Syst Rev*. 2016;4. <http://dx.doi.org/10.1002/14651858.CD001750.pub4>.
45. Wallenius M, Salvesen KA, Daltveit AK, Skomsvoll JF. Systemic lupus erythematosus and outcomes in first and subsequent births based on data from a national birth registry. *Arthritis Care Res (Hoboken)*. 2014;66:1718–24. <http://dx.doi.org/10.1002/acr.22373>.
46. Clowse ME, Jamison M, Myers E, James AH. A national study of the complications of lupus in pregnancy. *Am J Obstet Gynecol*. 2008;199:e1–6. <http://dx.doi.org/10.1016/j.ajog.2008.03.012>.

47. Chakravarty EF, Nelson L, Krishnan E. Obstetric hospitalizations in the United States for women with systemic lupus erythematosus and rheumatoid arthritis. *Arthritis Rheum.* 2006;54:899–907. <http://dx.doi.org/10.1002/art.21663>.
48. Andrade R, Sanchez ML, Alarcon GS, Fessler BJ, Fernandez M, Bertoli AM, et al. Adverse pregnancy outcomes in women with systemic lupus erythematosus from a multiethnic US cohort: LUMINA (LVI) [corrected]. *Clin Exp Rheumatol.* 2008;26:268–74.
49. Buyon JP, Kim MY, Guerra MM, Laskin CA, Petri M, Lockshin MD, et al. Predictors of pregnancy outcomes in patients with lupus: a cohort study. *Ann Intern Med.* 2015;163:153–63. <http://dx.doi.org/10.7326/M14-2235>.
50. Davis-Porada J, Kim MY, Guerra MM, Laskin CA, Petri M, Lockshin MD, et al. Low frequency of flares during pregnancy and post-partum in stable lupus patients. *Arthritis Res Ther.* 2020;22, <http://dx.doi.org/10.1186/s13075-020-2139-9>.
51. Madazli R, Bulut B, Erenel H, Gezer A, Guralp O. Systemic lupus erythematosus and pregnancy. *J Obstet Gynaecol.* 2010;30:17–20, <http://dx.doi.org/10.3109/01443610903315678>.
52. Cavallasca JA, Laborde HA, Ruda-Vega H, Nasswetter GG. Maternal and fetal outcomes of 72 pregnancies in Argentine patients with systemic lupus erythematosus (SLE). *Clin Rheumatol.* 2008;41–6. <http://dx.doi.org/10.1007/s10067-007-0649-3>.
53. Aggarwal N, Raveendran A, Suri V, Chopra S, Sikka P, Sharma A. Pregnancy outcome in systemic lupus erythematosus: Asia's largest single centre study. *Arch Gynecol Obstet.* 2011;284:281–5, <http://dx.doi.org/10.1007/s00404-010-1618-7>.
54. Al Arfaj AS, Khalil N. Pregnancy outcome in 396 pregnancies in patients with SLE in Saudi Arabia. *Lupus.* 2010;19:1665–73. <http://dx.doi.org/10.1177/0961203310378669>.
55. Ling N, Lawson E, von Scheven E. Adverse pregnancy outcomes in adolescents and young women with systemic lupus erythematosus: a national estimate. *Pediatr Rheumatol Online J.* 2018;26. <http://dx.doi.org/10.1186/s12969-018-0242-0>.
56. Moroni G, Doria A, Giglio E, Tani C, Zen M, Strigini F, et al. Fetal outcome and recommendations of pregnancies in lupus nephritis in the 21st century. A prospective multicenter study. *J Autoimmun.* 2016;74:6–12. <http://dx.doi.org/10.1016/j.jaut.2016.07.010>.
57. Chen D, Lao M, Zhang J, Zhan Y, Li W, Cai X, et al. Fetal and maternal outcomes of planned pregnancy in patients with systemic lupus erythematosus: a retrospective multicenter study. *J Immunol Res.* 2018. <http://dx.doi.org/10.1016/j.jaut.2016.07.010>, 2018:2413637.

58. Tedeschi SK, Guan H, Fine A, Costenbader KH, Bermas B. Organ-specific systemic lupus erythematosus activity during pregnancy is associated with adverse pregnancy outcomes. *Clin Rheumatol*. 2016;35:1725–32. <http://dx.doi.org/10.1007/s10067-016-3270-5>.
59. Jakobsen IM, Helmig RB, Stengaard-Pedersen K. Maternal and foetal outcomes in pregnant systemic lupus erythematosus patients: an incident cohort from a stable referral population followed during 1990–2010. *Scand J Rheumatol*. 2015;44:377–84. <http://dx.doi.org/10.3109/03009742.2015.1013982>.
60. Yelnik CM, Laskin CA, Porter TF, Branch DW, Buyon JP, Guerra MM, et al. Lupus anticoagulant is the main predictor of adverse pregnancy outcomes in aPL-positive patients: validation of PROMISSE study results. *Lupus Sci Med*. 2016;3:e000131, <http://dx.doi.org/10.1136/lupus-2015-000131>.
